# Supplementary material for: Surface engineering of a superamphiphilic, self-growing fibrous Janus membrane prepared from mycelium
Source: Royal Society of Chemistry journal article supplement (doi:10.1039/d3ta05220f), 2023-01-01
Supplement: d3ta05220f1.pdf [file d3ta05220f1.pdf]

## Electronic Supplementary Information

for

### Surface engineering of a superamphiphilic, self-growing fibrous Janus membrane prepared from mycelium

Joyce Cavalcante<sup>a,b</sup>, Gyorgy Szekely<sup>a,b,c\*</sup>

<sup>a</sup> Advanced Membranes and Porous Materials Center, Physical Science and Engineering Division (PSE), King Abdullah University of Science and Technology (KAUST), Thuwal, 23955-6900, Saudi Arabia

<sup>b</sup> Materials Science and Engineering Program, Physical Science and Engineering Division (PSE), King Abdullah University of Science and Technology (KAUST), Thuwal, 23955-6900, Saudi Arabia

<sup>c</sup> Chemical Engineering Program, Physical Science and Engineering Division (PSE), King Abdullah University of Science and Technology (KAUST), Thuwal, 23955-6900, Saudi Arabia

\* Corresponding author: +966128082769, [gyorgy.szekely@kaust.edu.sa](mailto:gyorgy.szekely@kaust.edu.sa), [www.SzekelyGroup.com](http://www.SzekelyGroup.com)

## Table of contents

|                                        |    |
|----------------------------------------|----|
| <b>List of figures</b> .....           | S2 |
| <b>List of tables</b> .....            | S2 |
| 1. Mycelium growth.....                | S3 |
| 2. Dissolution tests.....              | S3 |
| 3. Thermal characterization .....      | S4 |
| 4. Wetting behavior.....               | S4 |
| 5. Confocal fluorescence analysis..... | S5 |
| 6. Oil sorption analysis .....         | S7 |

## List of figures

|                                                                                                                                                                      |    |
|----------------------------------------------------------------------------------------------------------------------------------------------------------------------|----|
| Figure S1: Optical images of mycelium growth before and after 21 days of subculture inoculation. ....                                                                | S3 |
| Figure S2: DSC spectra of (a) PBI <sup>M</sup> , (b) <b>Mycelium</b> , (c) PBI, and (d) PP. ....                                                                     | S4 |
| Figure S3: Water and oil contact angle for $\alpha$ surface of mycelium. ....                                                                                        | S4 |
| Figure S4: (a) Water contact angle at surfaces and interfaces in/between mycelium and PBI. (b) Schematic drawing defining the region of contact angle analysis. .... | S5 |
| Figure S5: 2D segmentation using ImageJ for fluorescence microscopy. ....                                                                                            | S5 |
| Figure S6: Fluorescence optical microscopy of the many investigated interfaces. ....                                                                                 | S6 |
| Figure S7: (a) Crude oil and water sorption after 1-min treatment for different spill remediation systems. ....                                                      | S7 |

## List of tables

|                                                                                                                                       |    |
|---------------------------------------------------------------------------------------------------------------------------------------|----|
| Table S1: Dissolution tests of mycelium mats performed for up to 24 h in 11 different solvents. ....                                  | S3 |
| Table S2: 2D segmentation results obtained using ImageJ for fluorescence optical microscopy of surface and interfacial mycelium. .... | S6 |

## 1. Mycelium growth

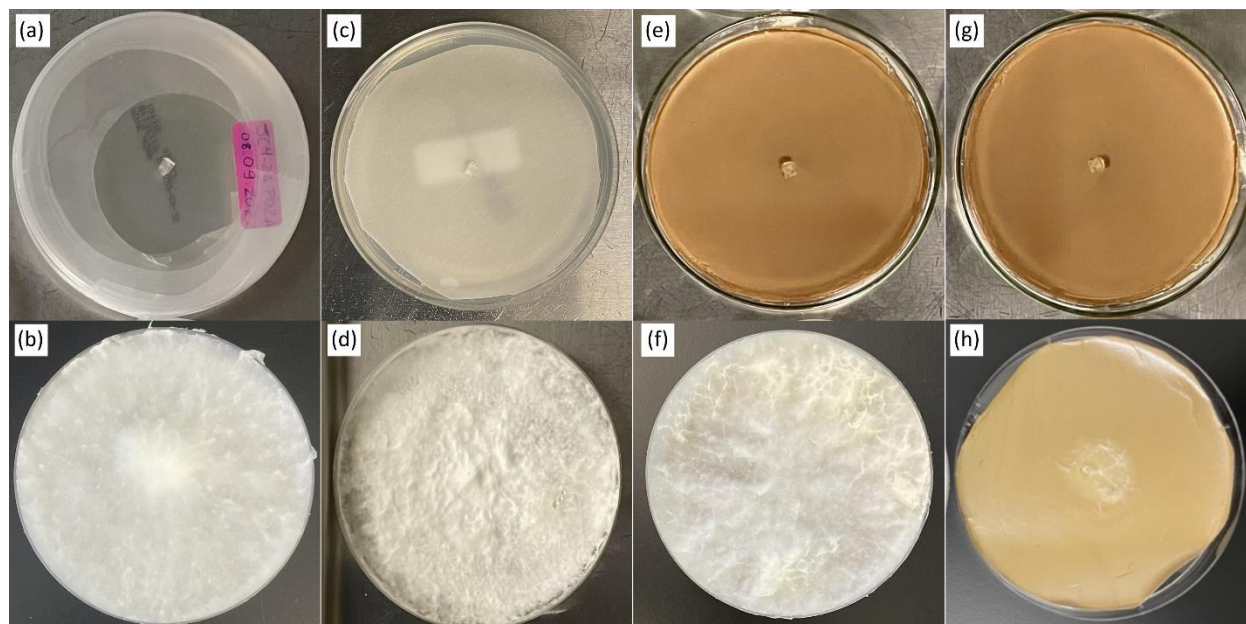

Figure S1: Optical images of mycelium growth before and after 21 days of subculture inoculation in (a, b) PDA, (c, d) PDA with PP microporous interlayer, (e, f) PDA with PBI nanoporous interlayer, and (g, h) PBI without PDA.

## 2. Dissolution tests

Table S1: Dissolution tests of mycelium mats performed for up to 24 h in 11 different solvents.

|       | H <sub>2</sub> O | Acetone | MeCN <sup>a</sup> | Ethanol | Ethyl acetate | Methanol | DMF <sup>b</sup> | DMAc <sup>c</sup> | DMSO <sup>d</sup> | Chloroform | THF <sup>e</sup> |
|-------|------------------|---------|-------------------|---------|---------------|----------|------------------|-------------------|-------------------|------------|------------------|
| 1 min | ✖                | ✖       | ✖                 | ✖       | ✖             | ✖        | ✖                | ✖                 | ✖                 | ✖          | ✖                |
| 1 h   | ●                | ✖       | ✖                 | ✖       | ✖             | ✖        | ●                | ●                 | ●                 | ✖          | ✖                |
| 24 h  | ●                | ✖       | ✖                 | ✖       | ✖             | ✖        | ●                | ●                 | ●                 | ✖          | ✖                |

<sup>a</sup> MeCN = acetonitrile, <sup>b</sup> DMF = dimethylformamide, <sup>c</sup> DMAc = dimethylacetamide, <sup>d</sup> DMSO = dimethyl sulfoxide, <sup>e</sup> THF = tetrahydrofuran

✖ Does not dissolve or swell

✖ Mild swelling

✖ Medium swelling

✖ Strong swelling

● Partially dissolves

● Strongly dissolves

● Completely dissolves

### 3. Thermal characterization

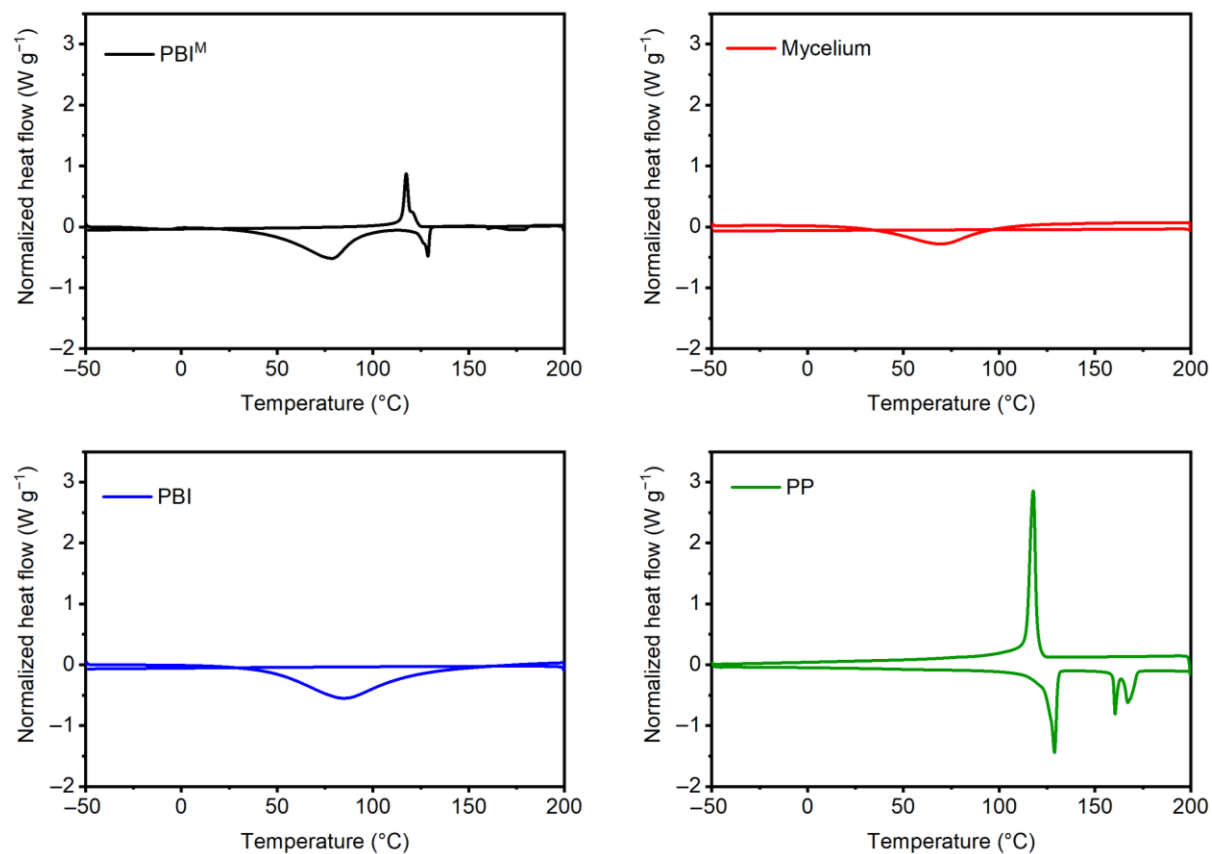

Figure S2: DSC spectra of (a) PBI<sup>M</sup>, (b) Mycelium, (c) PBI, and (d) PP.

### 4. Wetting behavior

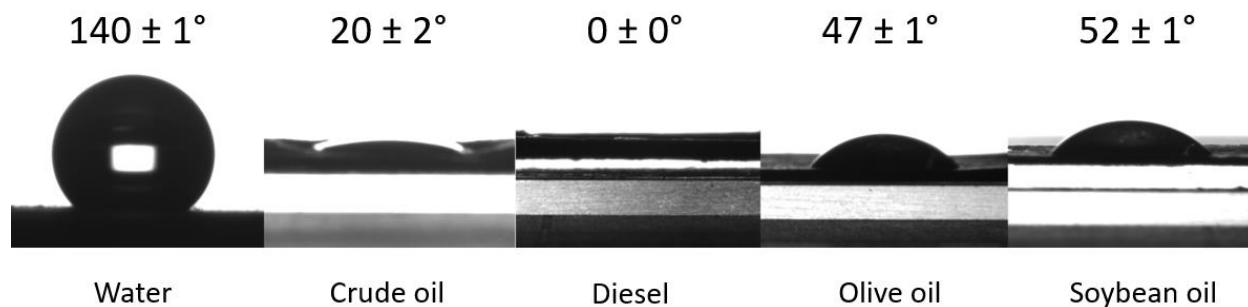

Figure S3: Water and oil contact angle for  $\alpha$  surface of mycelium grown with a nanoporous interlayer.

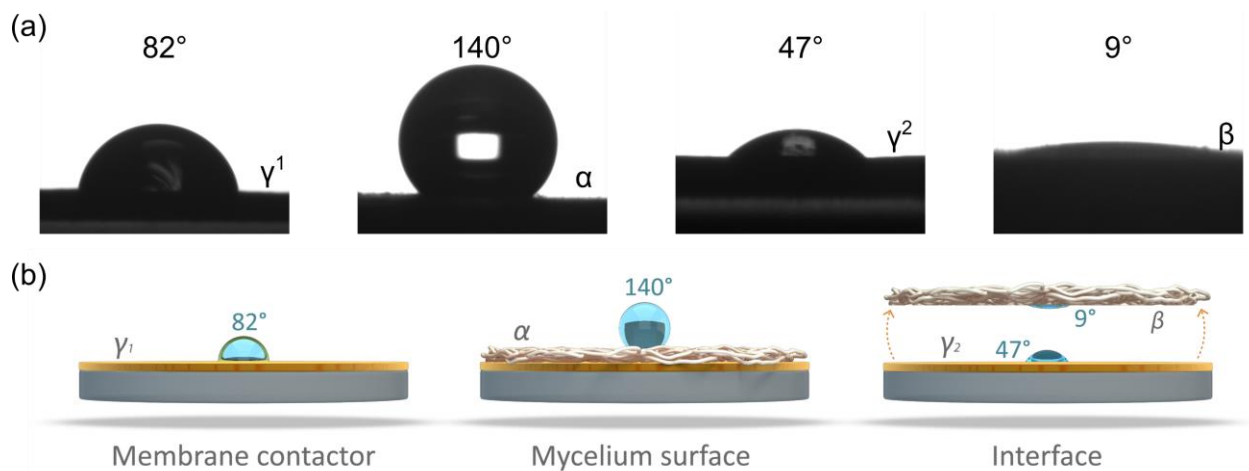

Figure S4: (a) Water contact angle at surfaces and interfaces in/between mycelium and PBI. (b) Schematic drawing defining the region of contact angle analysis.

## 5. Confocal fluorescence analysis

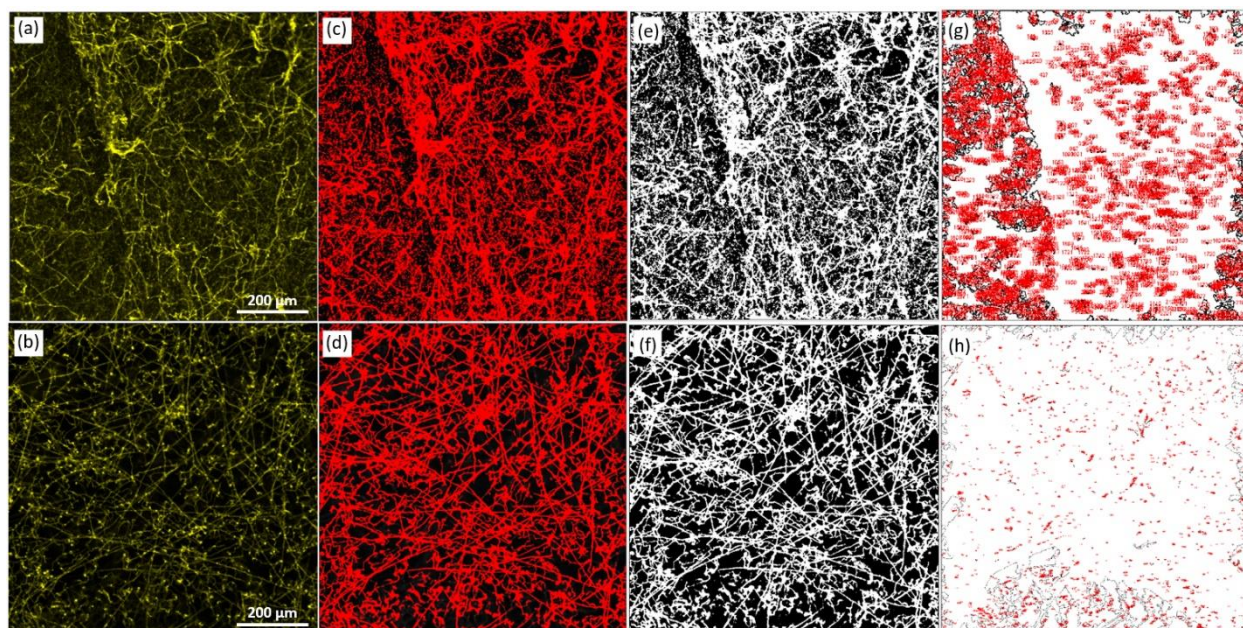

Figure S5: 2D segmentation using ImageJ at  $10\times$  magnification for fluorescence microscopy: (a, b) Threshold adjustment, (c, d) applied threshold, and (e, f) fiber segmentation analysis (g, h) for (a, c, e, g) top surface and (b, d, f, h) interfacial mycelium.

Table S2: 2D segmentation results obtained using ImageJ for fluorescence optical microscopy of surface and interfacial mycelium.

|                             | Count | Area (%) |
|-----------------------------|-------|----------|
| <b>Surface mycelium</b>     | 2242  | 48.230   |
| <b>Interfacial mycelium</b> | 2876  | 39.896   |

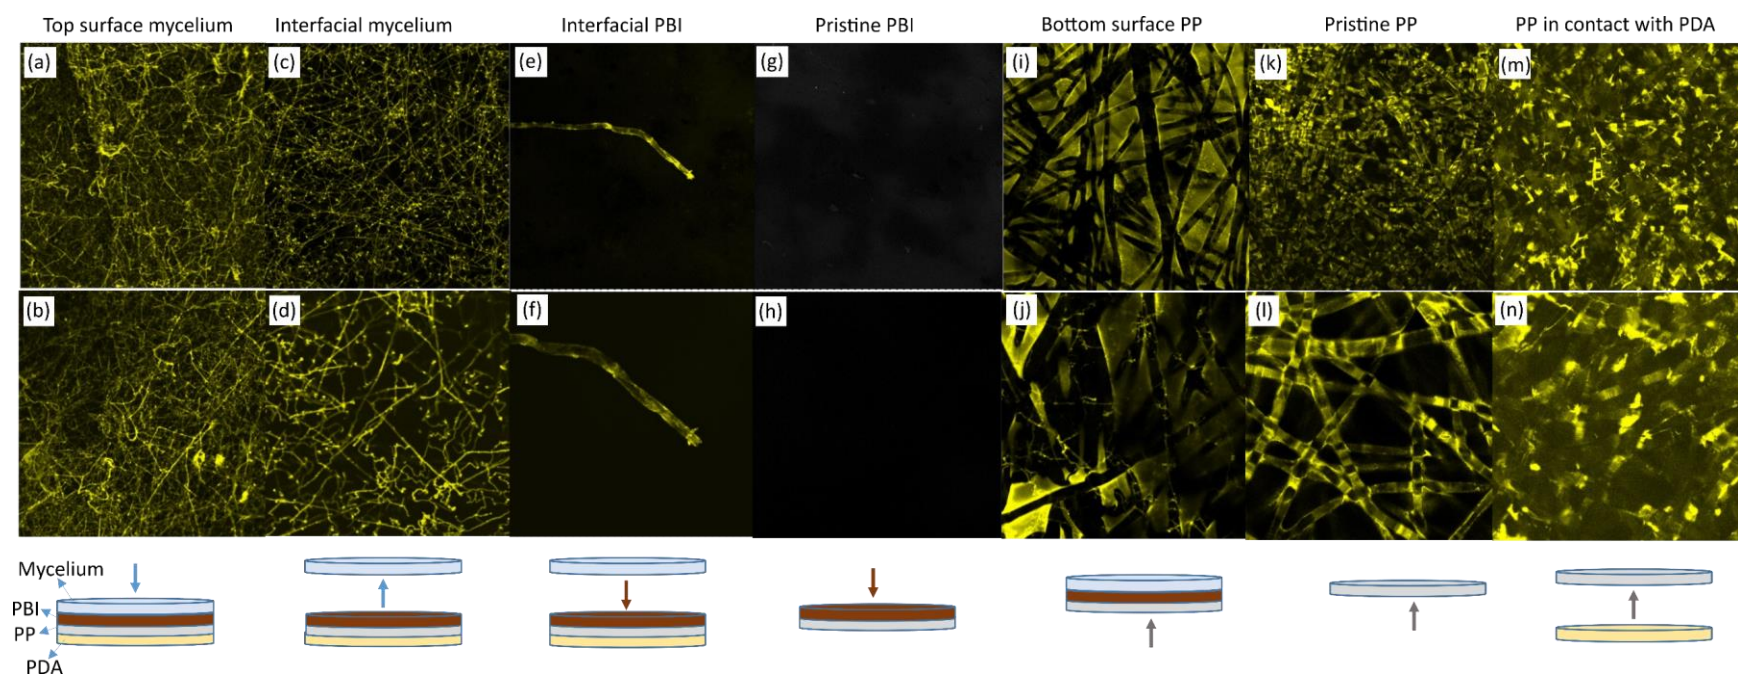

Figure S6: Fluorescence optical microscopy of the many investigated interfaces: (a, b) top surface mycelium view, (c, d) interfacial mycelium view, (e, f) interfacial PBI view, (g, h) pristine PBI view, (i, j) bottom surface PP view, (k, l) pristine PP view, and (m, n) PP in contact with PDA for 21 days. (a, c, e, g, i, k, m) 10× magnification and (b, d, f, h, j, l, n) 20× magnification.

## 6. Oil sorption analysis

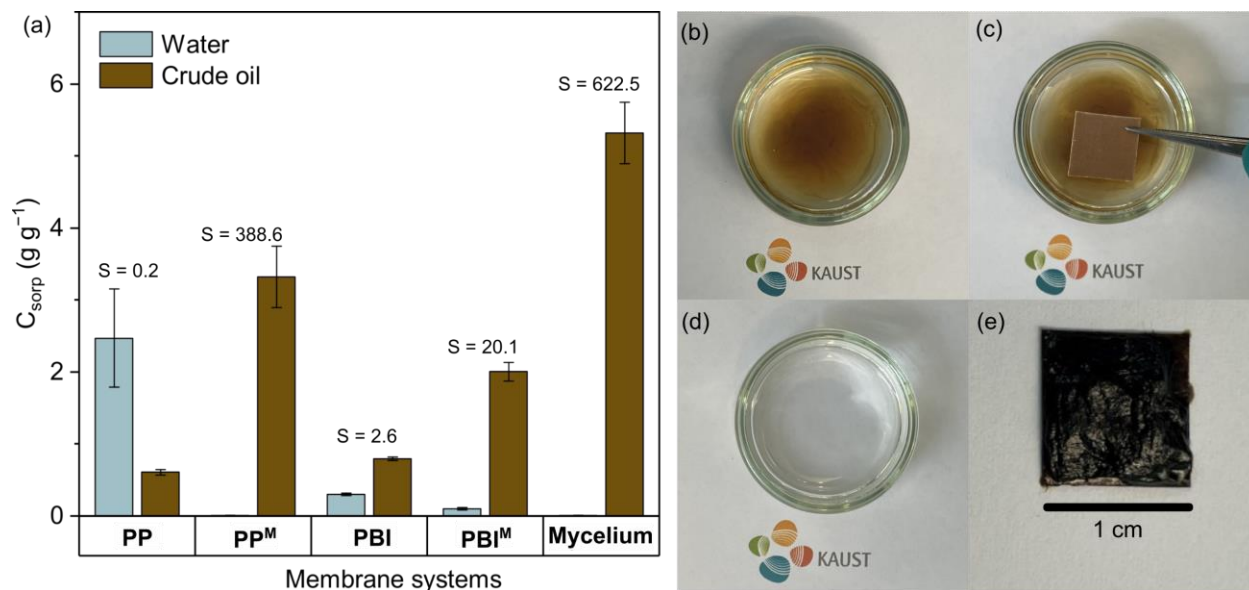

Figure S7: (a) Crude oil and water sorption after 1-min treatment for different spill remediation systems; optical photos for the treatment of crude oil spillage on water (b) before, (c) during, and (d, e) after treatment of crude oil spill.
